# Supplementary material for: Dynamics of genomic and immune responses during primary immunotherapy resistance in mismatch repair–deficient tumors
Source: PubMed Central journal article supplement — Cold Spring Harb Mol Case Stud. 2020 Oct;6(5):a005678. doi: 10.1101/mcs.a005678 (PMC7552928; doi:10.1101/mcs.a005678), 2020-10

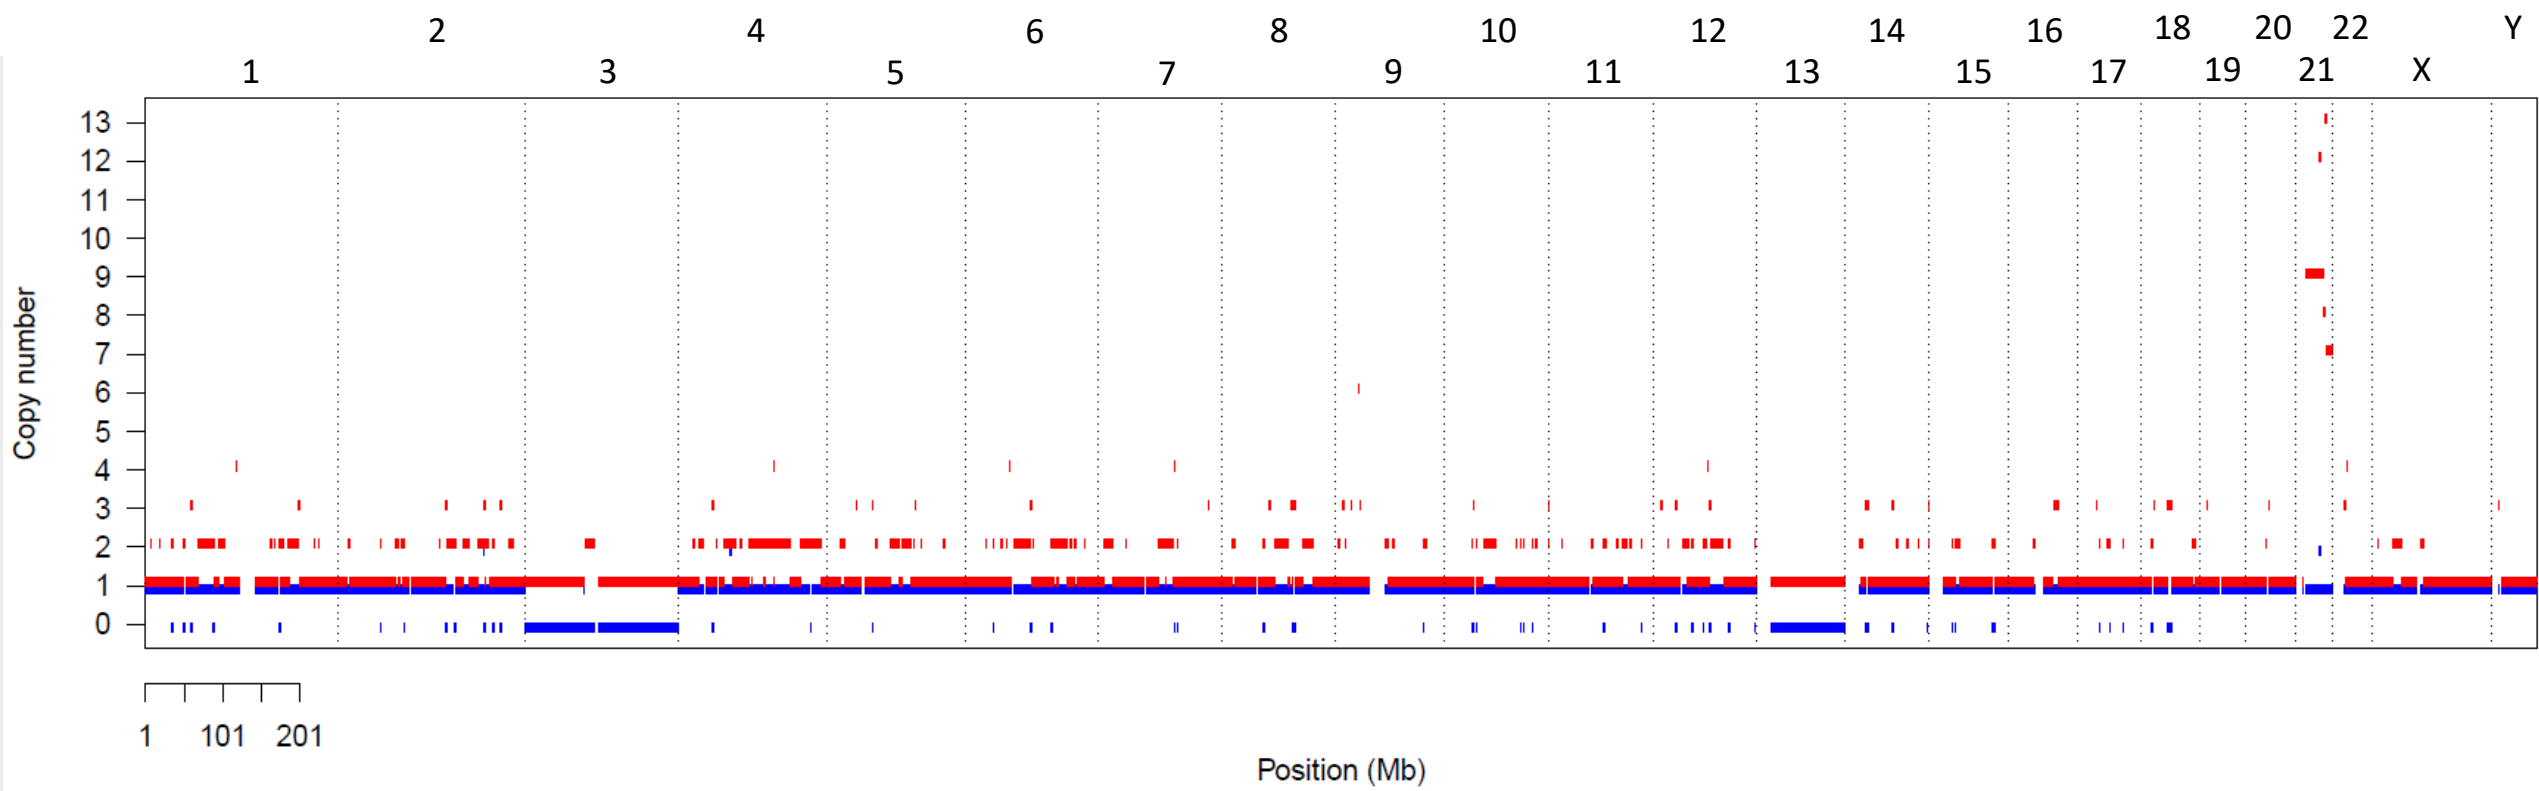

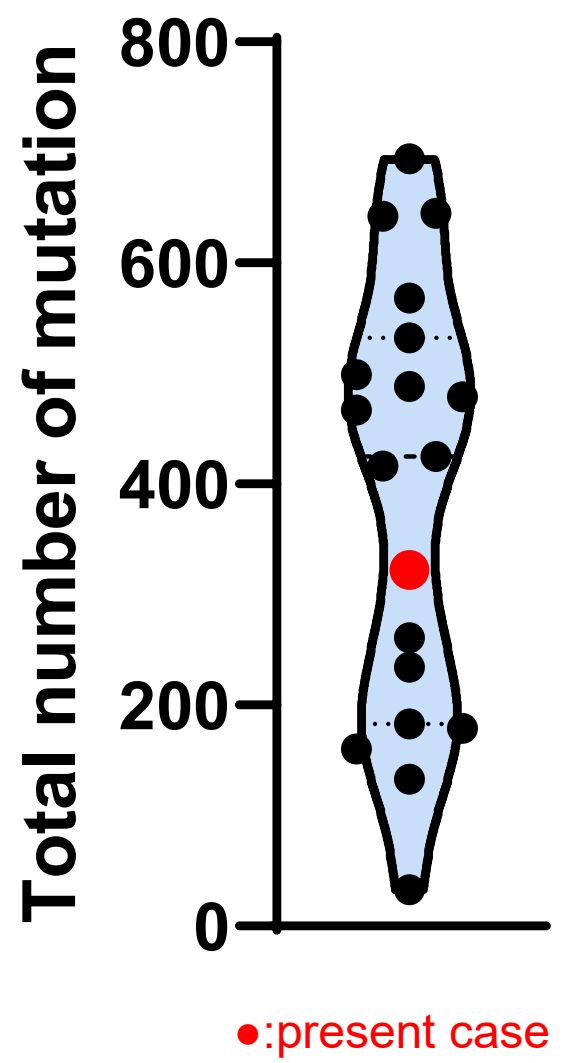

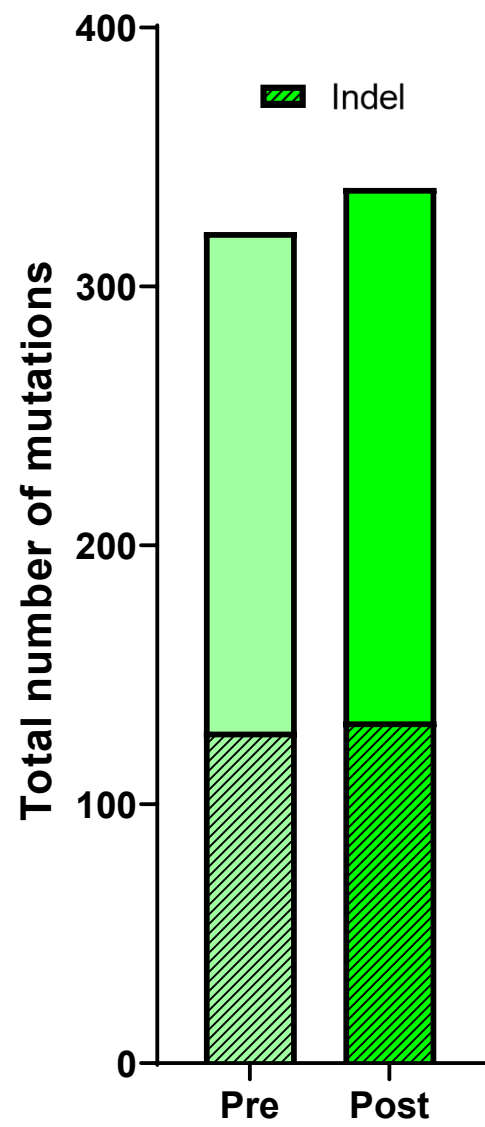

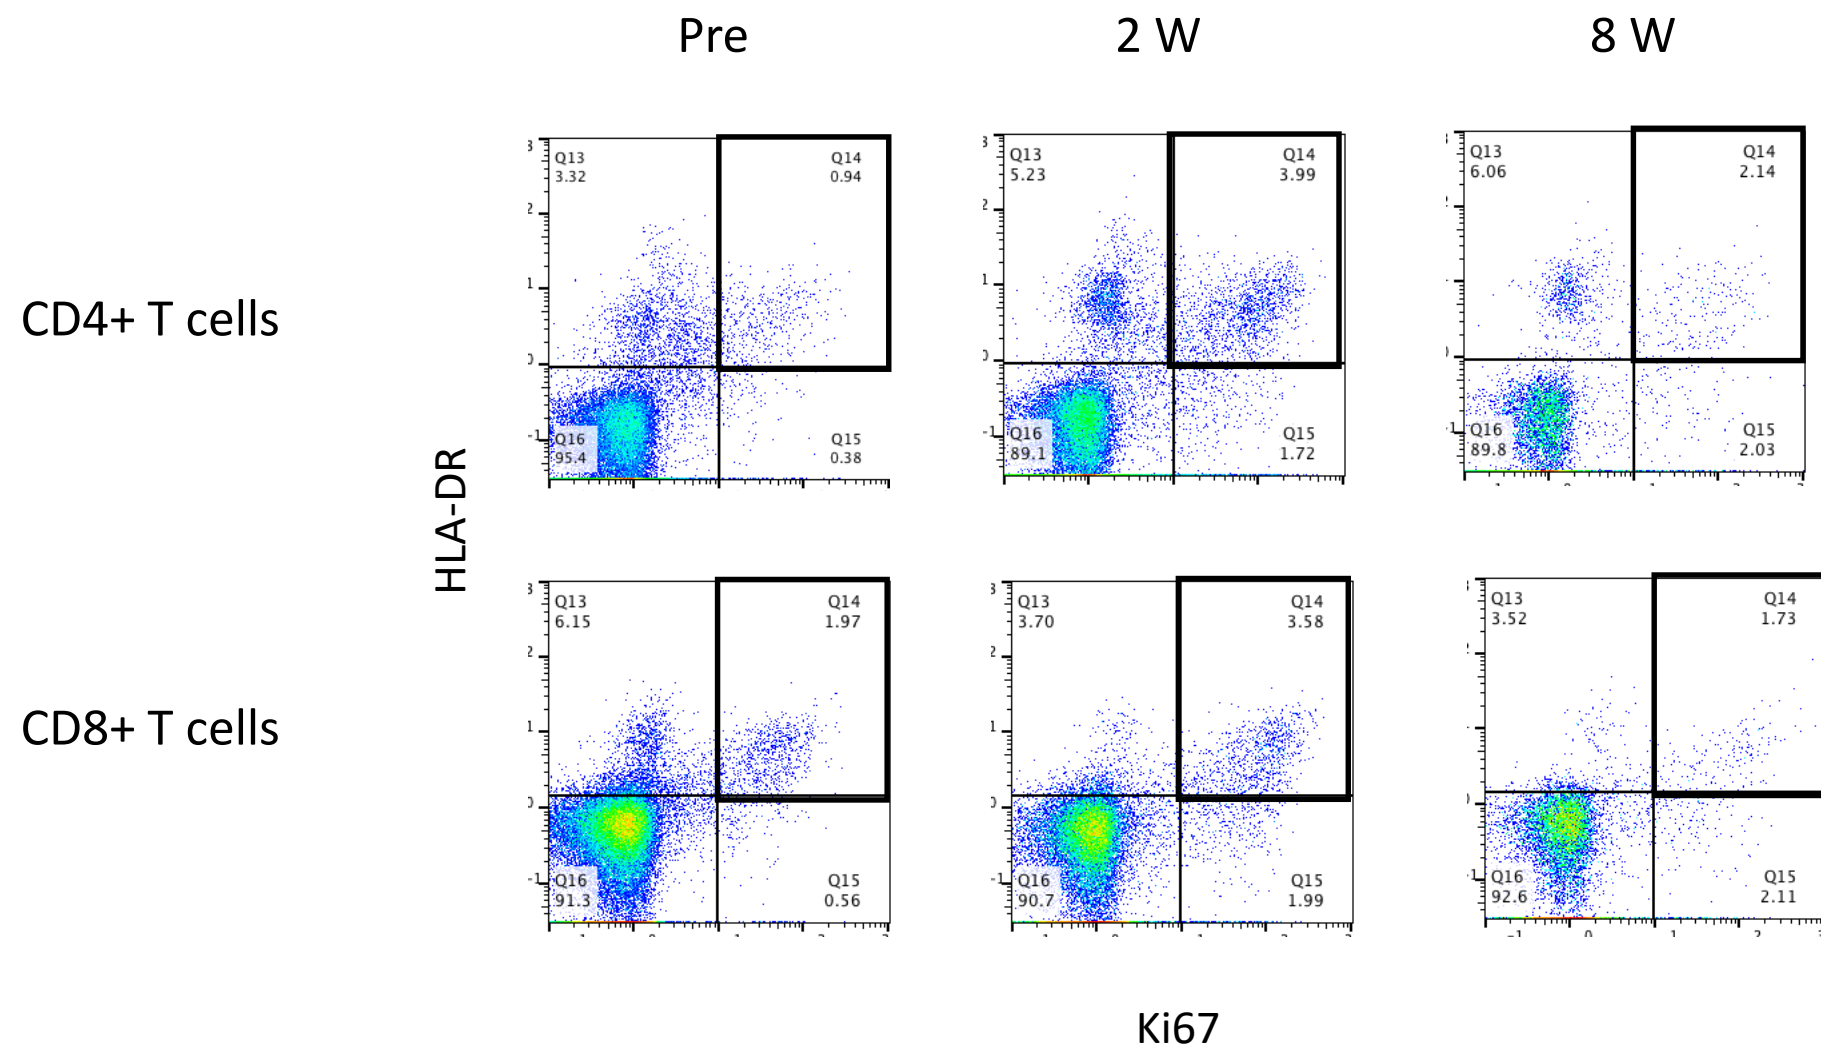

# Takahashi et al. Supplementary Figure S5

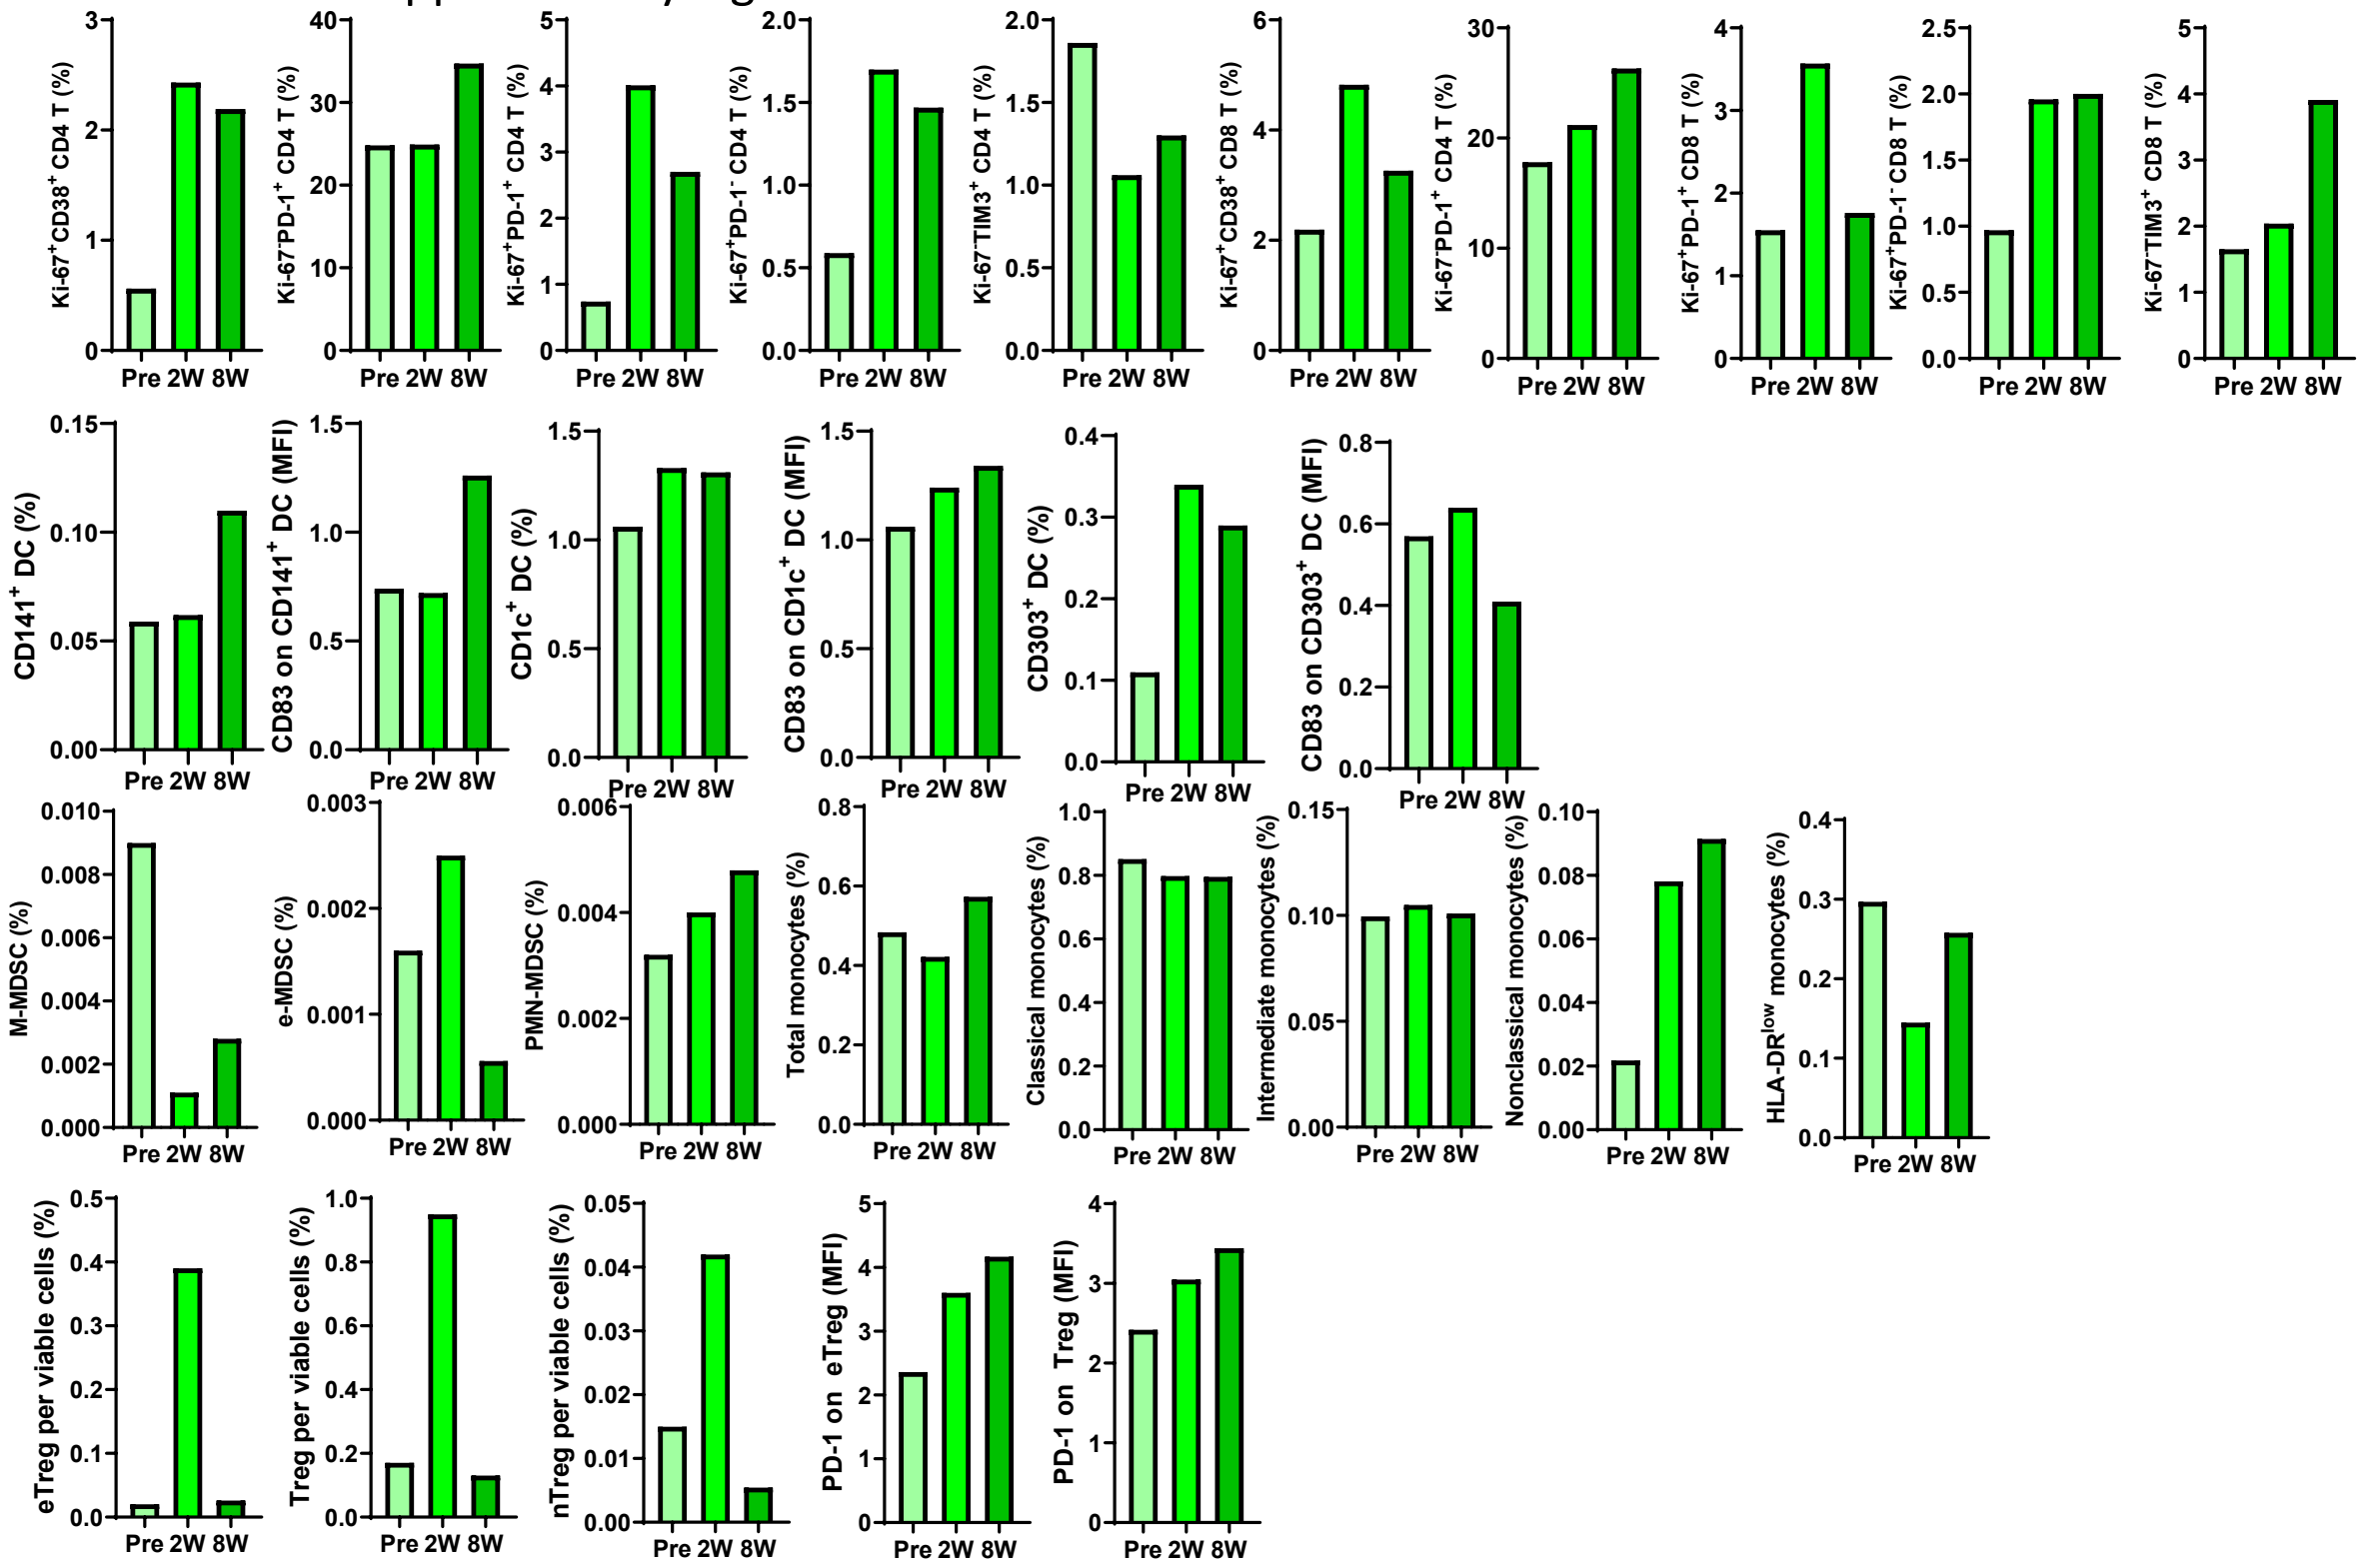

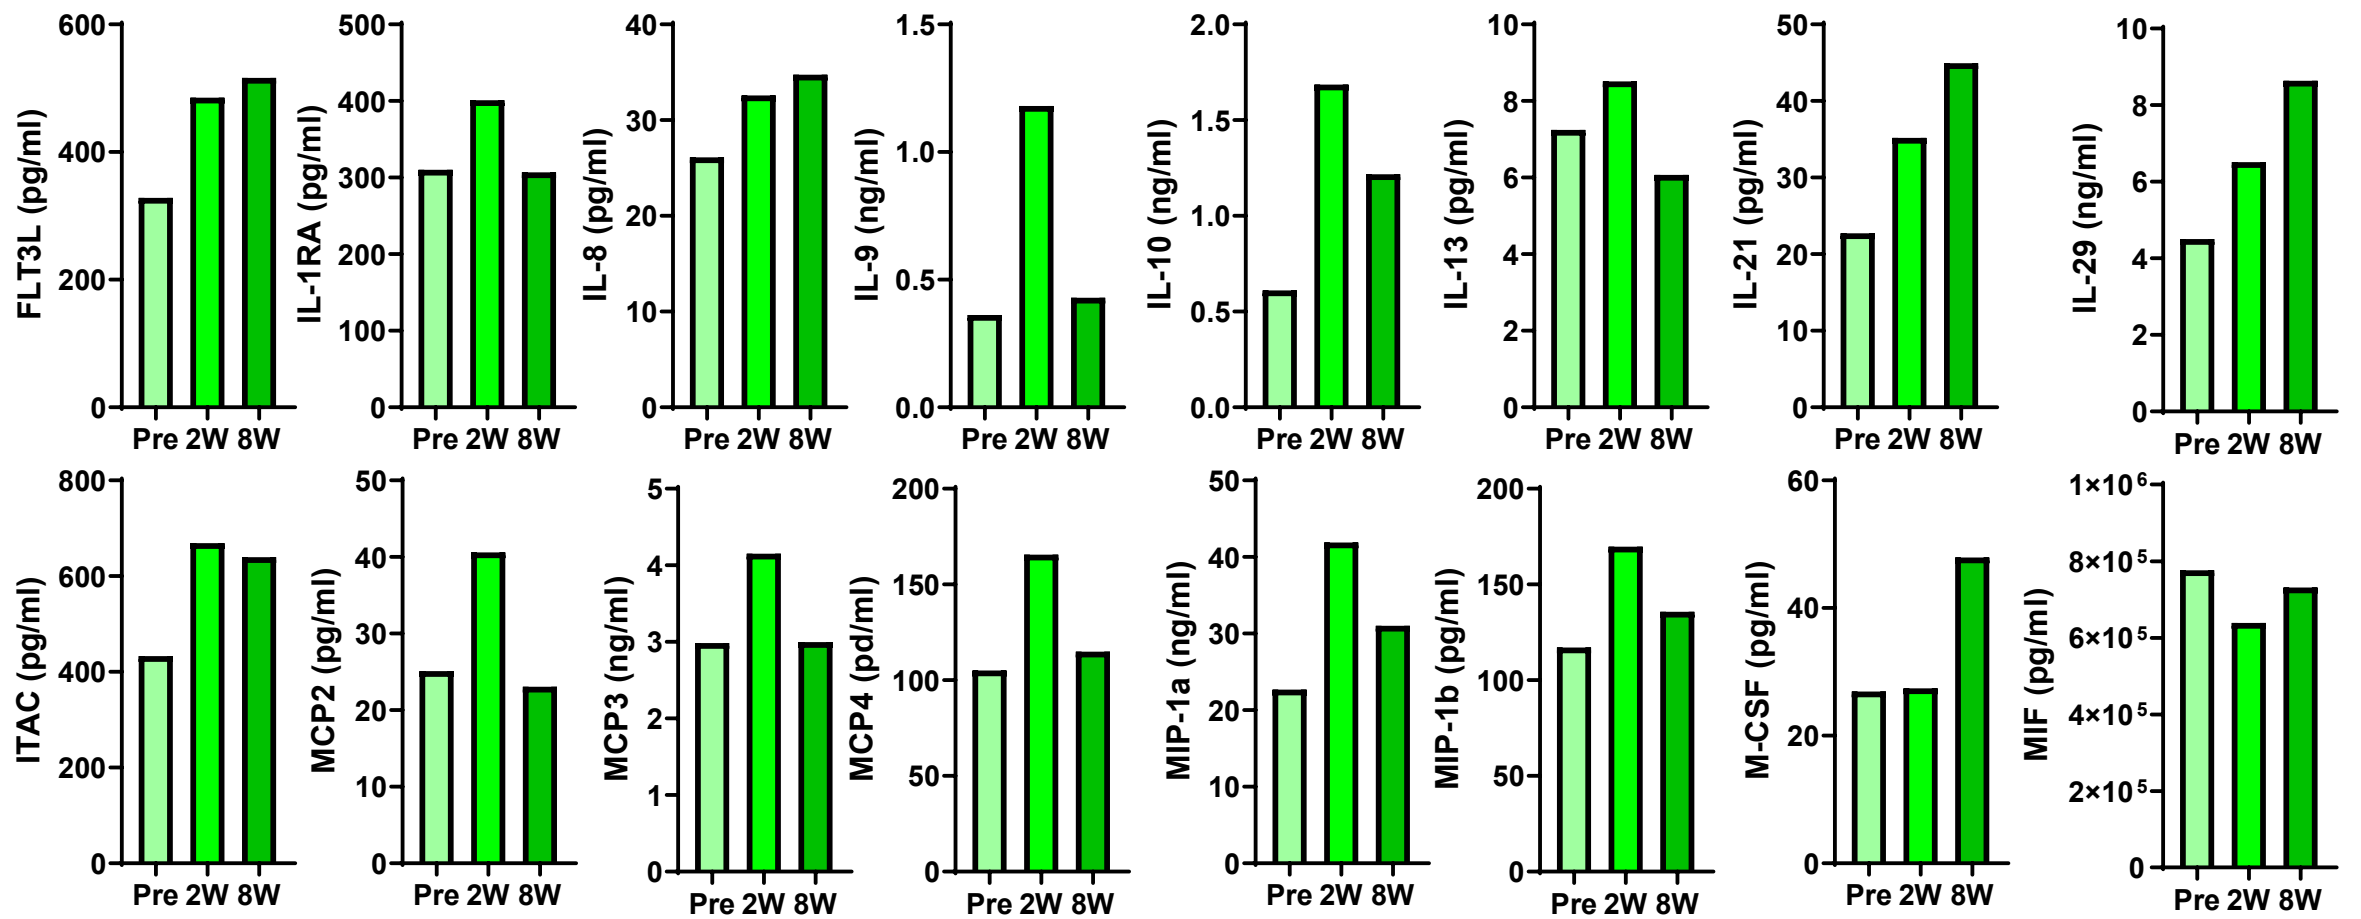

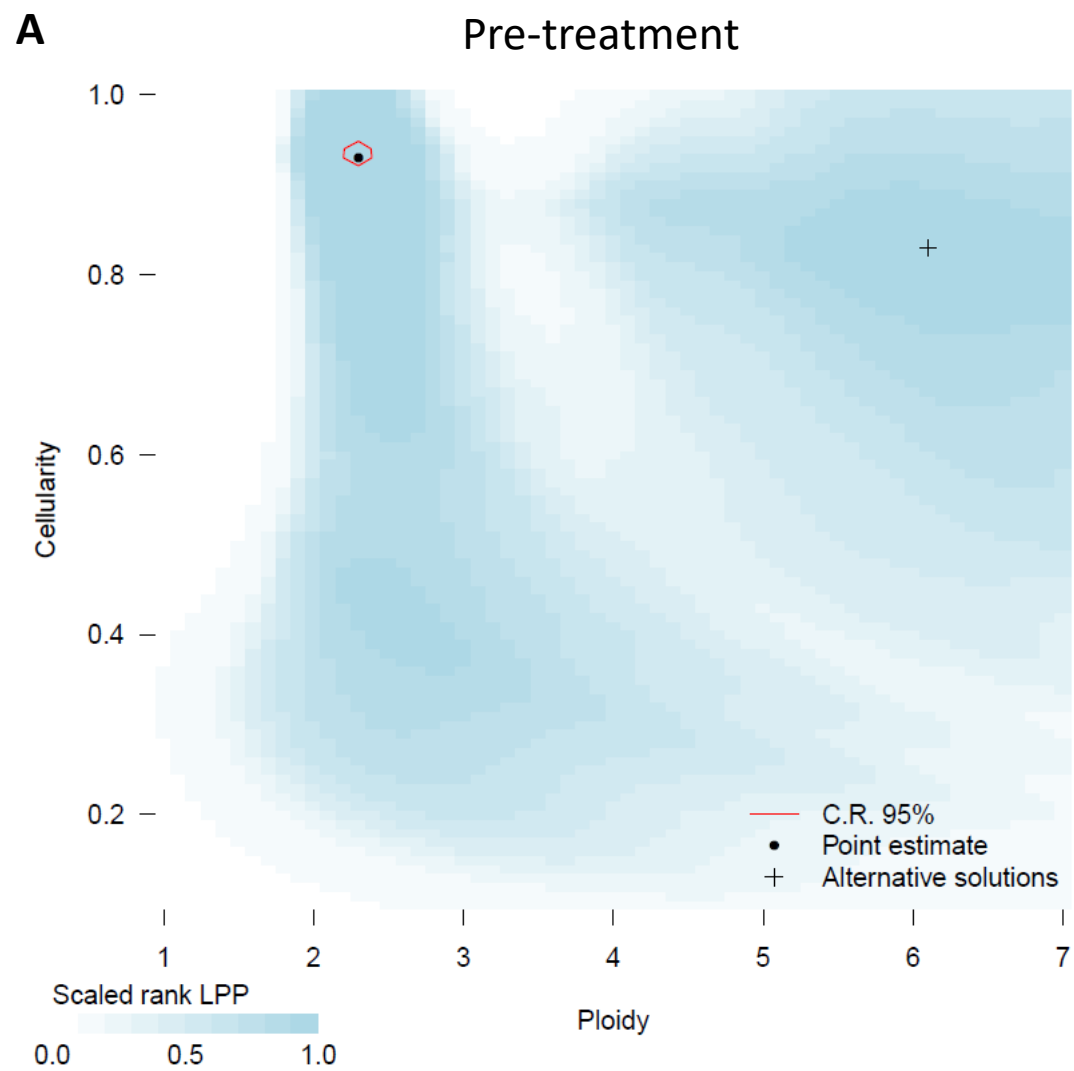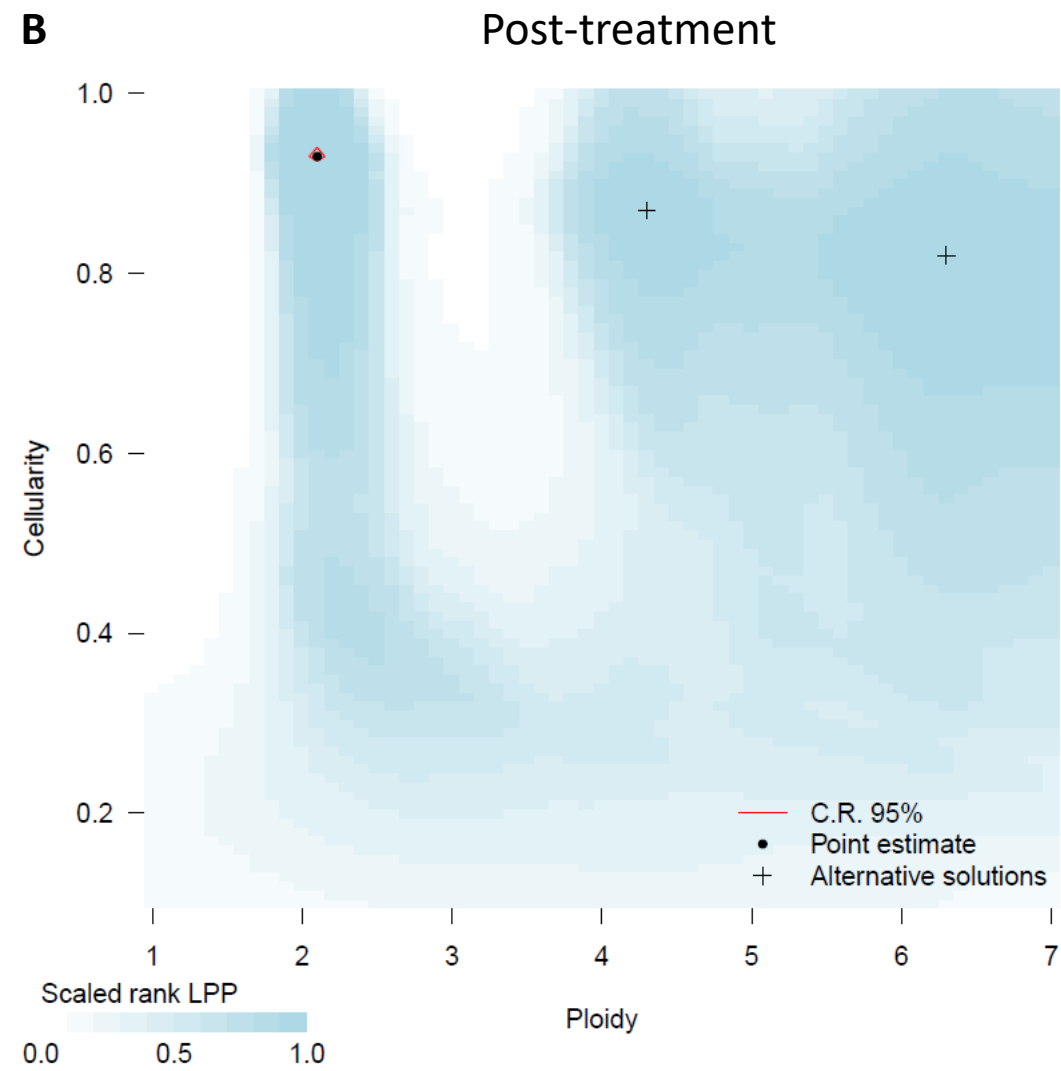

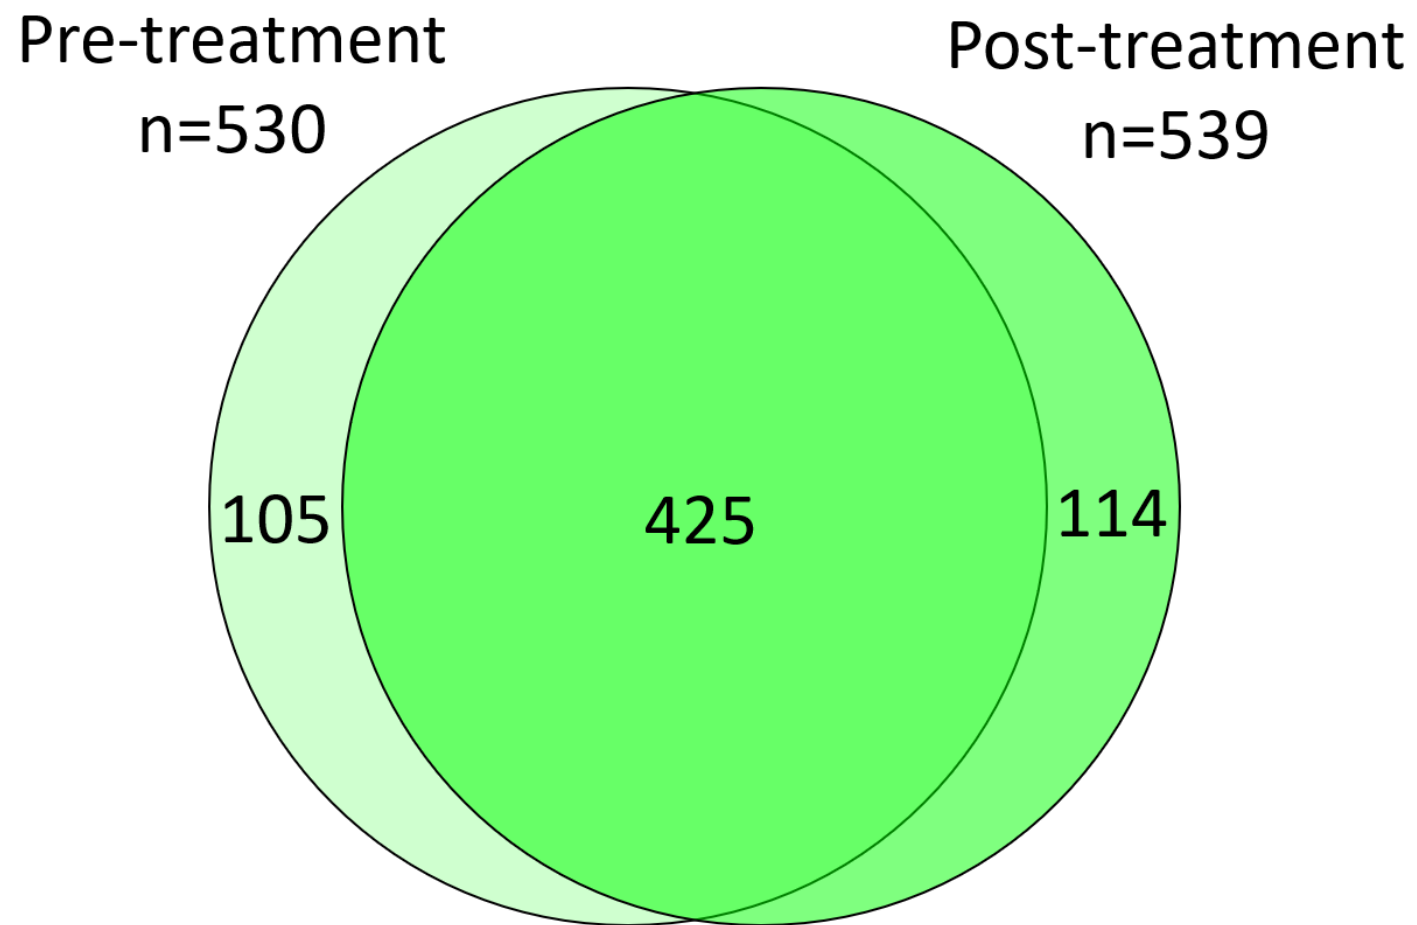



c.1289delC:p. Pro430Argfs\*2

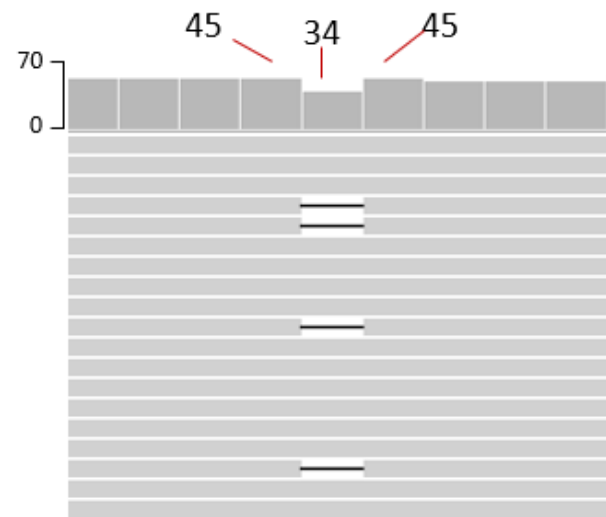

|              |     |                   |   |   |   |   |   |   |   |
|--------------|-----|-------------------|---|---|---|---|---|---|---|
| Ref. DNA (-) | C   | A                 | A | C | G | G | G | G | G |
| Amino acid   | Ref | L                 |   |   | P |   |   | P |   |
|              | Alt | <i>frameshift</i> |   |   | P |   |   | P |   |

c.2580delA, p. Lys860Asnfs\*16

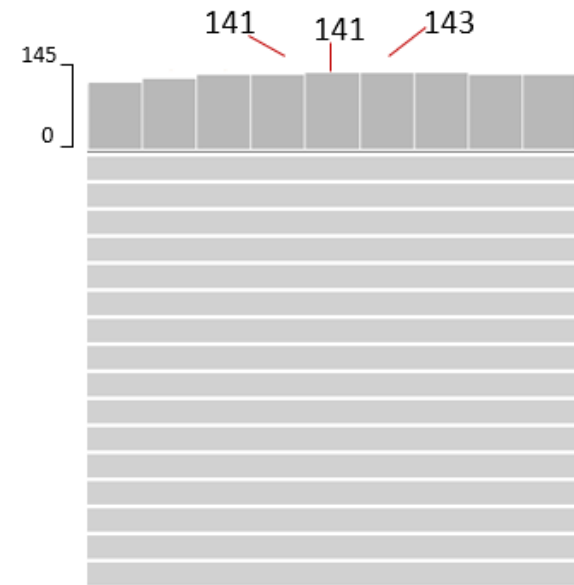

|              |     |   |   |   |   |   |   |   |   |
|--------------|-----|---|---|---|---|---|---|---|---|
| Ref. DNA (-) | T   | G | G | T | T | T | T | T | T |
| Amino acid   | Ref | P |   | K |   |   | K |   |   |
|              | Alt | P |   | K |   |   | K |   |   |

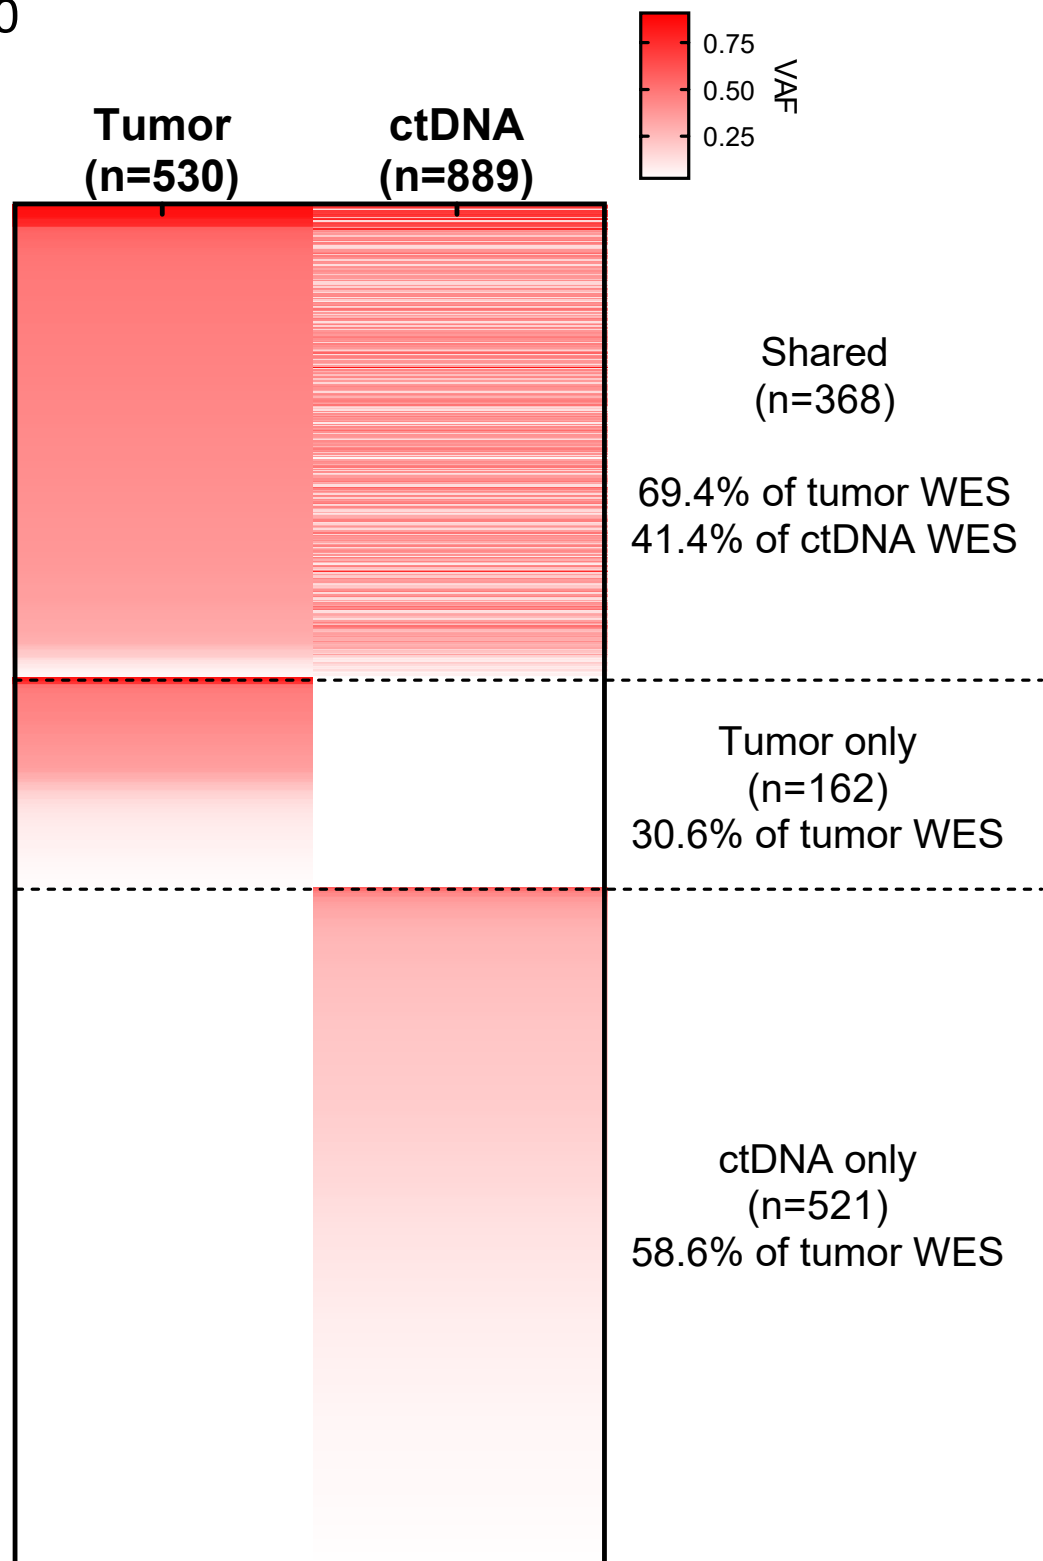

Supplement: supp_mcs.a005678_Supplemental_Figures.pdf [file supp_mcs.a005678_Supplemental_Figures.pdf]
